# Supplementary material for: A Qualitative Study of Operating Room Nurses' Perceptions of Shadowing Education for Nursing Students: Insights from a Single Acute Care Hospital in Japan
Source: Research Square preprint supplement (doi:10.21203/rs.3.rs-6664826/v1), 2025-07-14
Supplement: Supplementary file 1 [file c3428ccfc2bd0f5e28724e2a.docx]

**Interview Guide**

Thank you for participating in this interview. The purpose of this interview is to understand the thoughts and practices of operating room nurses in Japan who are involved in providing shadowing education to nursing students. The interview focuses on your experiences and thoughts related to shadowing education. All interview content will be anonymized and used solely for research purposes.

**1. Background Information**

How many years of nursing experience do you have and how many years of experience as an operating room nurse?

Can you tell us about your experience before working in the operating room?

What motivated you to engage in shadowing education for nursing students?

**2. Shadowing Education Practices**

Can you describe a typical day when you are involved in shadowing education for nursing students?

How do you prepare for shadowing education sessions?

What specific roles and responsibilities do you emphasize during shadowing education?

How do you integrate the observation and participation of nursing students into your daily duties?

**3. Thoughts on Shadowing Education**

What are your thoughts on the effectiveness of shadowing as a teaching method for nursing students?

Can you share any memorable episodes or experiences related to shadowing education?

How do you perceive the impact of shadowing on the students' learning and professional development?

What challenges have you encountered in providing shadowing education, and how have you addressed them?

**4. Demonstrating Nursing Practices**

How do you demonstrate the flow of circulating and instrument nurse duties during shadowing?

How do you involve students in patient communication and care during surgery?

What strategies do you use to convey the importance of multidisciplinary collaboration and teamwork in the operating room?

How do you manage the potential mental burden on students during shadowing, and how do you ensure they benefit from the experience?

**5. Work Environment and Shadowing**

How does the operating room environment influence your approach to shadowing education?

How do you communicate and collaborate with other medical staff when students are shadowing you?

What measures do you take to ensure that the shadowing experience is positive and educational for the students?

**6. Reflection and Feedback**

How do you reflect on your shadowing education practices after each session?

What feedback have you received from students, and how has it influenced your approach to shadowing?

What improvements or changes would you like to see in the shadowing education process?
